# Supplementary material for: ETV4 transcription factor and MMP13 metalloprotease are interplaying actors of breast tumorigenesis
Source: Springer Nature journal article supplement (doi:10.1186/s13058-018-0992-0), 2018-07-11
Supplement: MOESM2 [file 15945704]

**Table S1: Pathological and clinical characteristics of patients in relation to metastasis free survival (MFS)**

|                                               | Number of patients (%) | Number of metastasis (%) | MFS <i>p</i> -value <sup>a</sup> |
|-----------------------------------------------|------------------------|--------------------------|----------------------------------|
| <i>Total</i>                                  | 456 (100.0)            | 181 (39.7)               |                                  |
| <i>Age</i>                                    |                        |                          |                                  |
| ≤50                                           | 98 (21.5)              | 39 (39.8)                | 0.88 (NS)                        |
| >50                                           | 358 (78.5)             | 142 (39.7)               |                                  |
| <i>SBR histological grade</i> <sup>b, c</sup> |                        |                          |                                  |
| I                                             | 58 (13)                | 11 (19.0)                | <b>0.0011</b>                    |
| II                                            | 229 (51.2)             | 93 (40.6)                |                                  |
| III                                           | 160 (35.8)             | 73 (45.6)                |                                  |
| <i>Lymph node status</i> <sup>d</sup>         |                        |                          |                                  |
| 0                                             | 119 (26.1)             | 36 (30.3)                | <b>0.00000012</b>                |
| 1-3                                           | 237 (52.1)             | 83 (35.0)                |                                  |
| >3                                            | 96 (21.8)              | 60 (62.5)                |                                  |
| <i>Macroscopic tumor size</i> <sup>e</sup>    |                        |                          |                                  |
| ≤25mm                                         | 223 (49.8)             | 69 (30.9)                | <b>0.000014</b>                  |
| >25mm                                         | 225 (50.2)             | 111 (49.3)               |                                  |
| <i>ER<math>\alpha</math> status</i>           |                        |                          |                                  |
| Negative                                      | 118 (25.9)             | 50 (42.4)                | 0.077 (NS)                       |
| Positive                                      | 338 (74.1)             | 131 (38.8)               |                                  |
| <i>PR status</i>                              |                        |                          |                                  |
| Negative                                      | 194 (42.5)             | 86 (44.3)                | <b>0.013</b>                     |
| Positive                                      | 262 (57.5)             | 95 (36.3)                |                                  |
| <i>ERBB2 status</i>                           |                        |                          |                                  |
| Negative                                      | 357 (78.3)             | 138 (38.7)               | 0.27 (NS)                        |
| Positive                                      | 99 (21.7)              | 43 (43.4)                |                                  |
| <i>Molecular subtypes</i>                     |                        |                          |                                  |
| HR- ERBB2-                                    | 68 (14.9)              | 26 (38.2)                | 0.055 (NS)                       |
| HR- ERBB2+                                    | 45 (9.9)               | 23 (51.1)                |                                  |
| HR+ ERBB2-                                    | 289 (63.4)             | 112 (38.8)               |                                  |
| HR+ ERBB2+                                    | 54 (11.8)              | 20 (37.0)                |                                  |
| <i>PIK3CA mutation status</i>                 |                        |                          |                                  |
| wild type                                     | 307 (67.3)             | 129 (42.0)               | 0.071 (NS)                       |
| mutated                                       | 149 (32.7)             | 52 (34.9)                |                                  |
| <i>MMP13 and ETV4 mRNA expression</i>         |                        |                          |                                  |
| Low <i>ETV4</i>                               | 82 (18.0)              | 30 (36.6)                | <b>0.000041</b>                  |
| Low <i>MMP13</i> and high <i>ETV4</i>         | 255 (55.9)             | 86 (33.7)                |                                  |
| High <i>MMP13</i> and high <i>ETV4</i>        | 119 (26.1)             | 65 (54.6)                |                                  |

Abbreviations: ER $\alpha$ : oestrogen receptor alpha; PR: progesterone receptor; ERBB2: human epidermal growth factor receptor 2. The bold values are statistically significant (*p*-value<0.05).

<sup>a</sup> Log-rank test.

<sup>b</sup> Scarff Bloom Richardson classification.

<sup>c</sup> Information available for 447 patients.

<sup>d</sup> Information available for 452 patients.

<sup>e</sup> Information available for 448 patients.
