# Supplementary material for: ETV4 transcription factor and MMP13 metalloprotease are interplaying actors of breast tumorigenesis
Source: Springer Nature journal article supplement (doi:10.1186/s13058-018-0992-0), 2018-07-11

a.

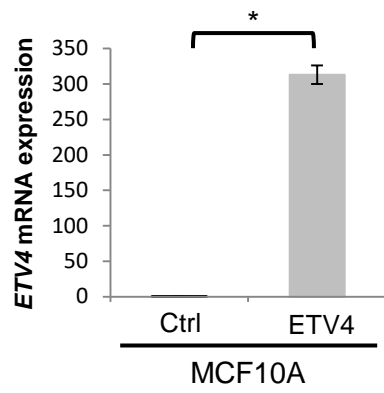

b.

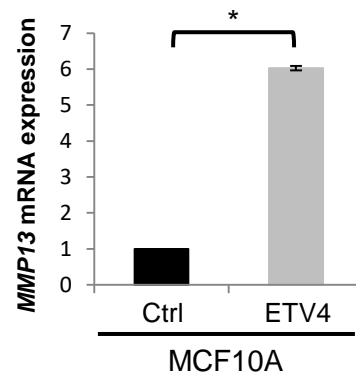

c.

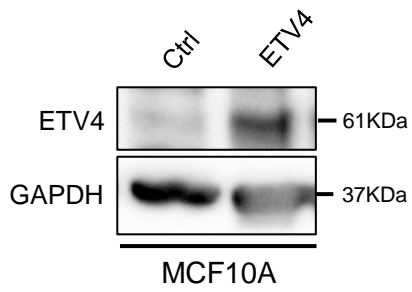

d.

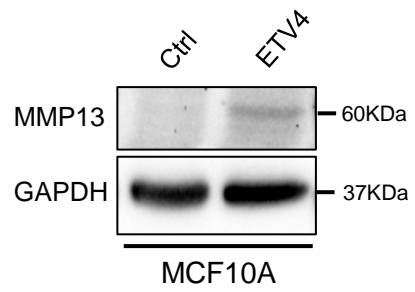

Supplement: MOESM3 [file 15945704]
