# Supplementary material for: ETV4 transcription factor and MMP13 metalloprotease are interplaying actors of breast tumorigenesis
Source: Springer Nature journal article supplement (doi:10.1186/s13058-018-0992-0), 2018-07-11
Supplement: MOESM4 [file 15945704]

```

mus      AAGTAGAGATGCCTTCATTTTCATTTCCCTCAGATTCTGCCACAAACCACACTTAGGAA
homo    AACAAGAGATGCTCTCATTTAT-ATTTCCCTCAAATTCTACCACAAACCACACTCGGGAG
rattus  AACTAGAGATGCCCTAATTTTCATTTCCCTCAGGTTCTGCCACAAACCACAGTACGAA
      **      *****      *      **      *****      **      *****      **

mus      GAAAAAAAAATA----CCATGTAAGCATGTTTACCTTCGCCTCACTAGGAAGTTAACACA
homo    GGAAAAGAAAAAGTCGCCACGTAAGCATGTTTACCTTCAAGTGACTGGGAAGTGGAAACC
rattus  --AAAAAAAAATA----CCACGTAAGCATGTTTACCTTCGACTCACTAGGAAGTGAACACC
      ****  ***  *      **  *****      *  ***  *****  *  **

mus      CACC--CCAAAGTGGTGACTCATCACTATCATGCTATAAAATAGAAGATG-----
homo    TATC--CATAAGTGATGACTCACCATTGCAGGCCTATAAAAGTAAAGGTAATCTCTGCGG
rattus  CCCACCCCAAGTGGTGACTCATCACTATTGCTCTATAAAATAGAGAATGCTTGCCTGG
      *  *  *****  *****  **  *      *****      *  *

mus      -----
homo    AAAG-----
rattus  GAAGGAGAGACTCCAGGCACT

```

ETS Binding Site

AP1 Binding Site

Figure S2
