# Supplementary material for: ETV4 transcription factor and MMP13 metalloprotease are interplaying actors of breast tumorigenesis
Source: Springer Nature journal article supplement (doi:10.1186/s13058-018-0992-0), 2018-07-11
Supplement: MOESM9 [file 15945704]

a.

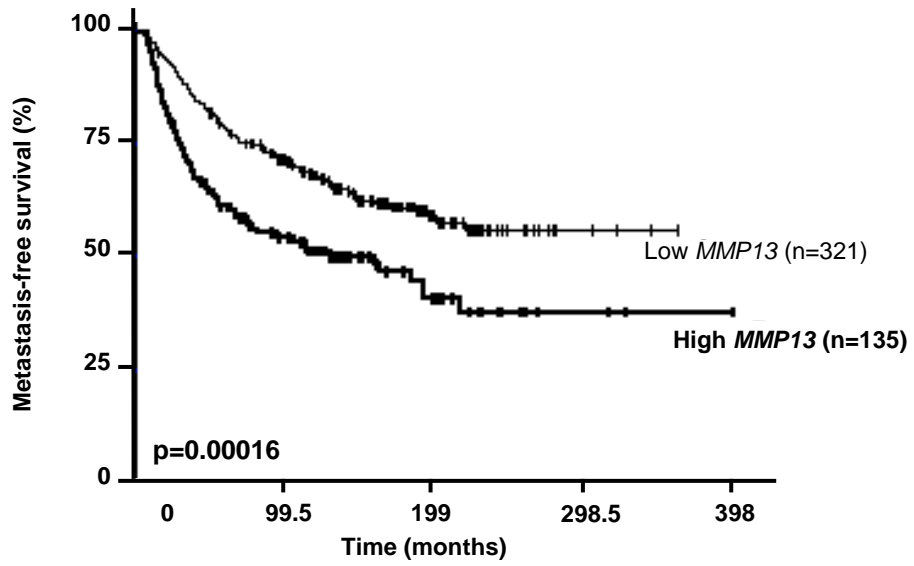

b.

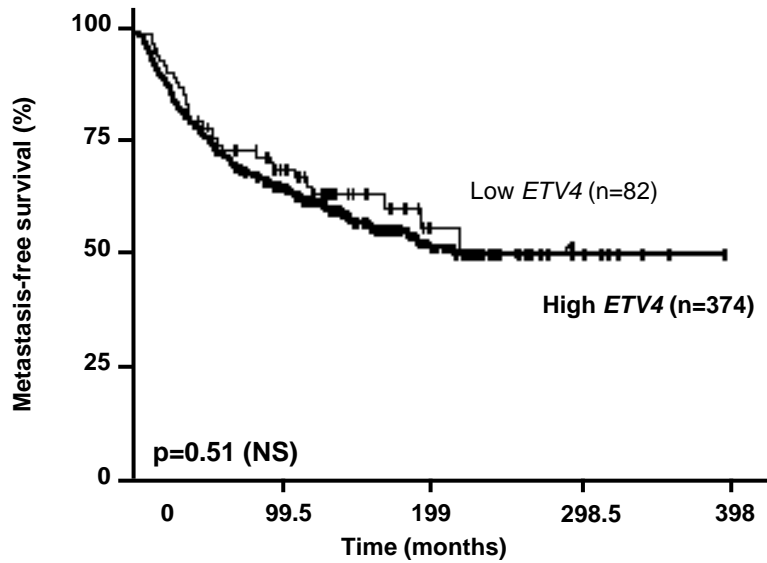

Figure S7
