# Supplementary material for: ETV4 transcription factor and MMP13 metalloprotease are interplaying actors of breast tumorigenesis
Source: Springer Nature journal article supplement (doi:10.1186/s13058-018-0992-0), 2018-07-11
Supplement: MOESM11 [file 15945704]

**Table S2: Multivariate COX analysis of MFS for *MMP13* and *ETV4* expression level in the series of 456 breast tumors.**

| <b>Characteristics</b>                |                                        | <b>HR <sup>a</sup></b> | <b>95% CI <sup>b</sup></b> | <b>p-value <sup>c</sup></b> |
|---------------------------------------|----------------------------------------|------------------------|----------------------------|-----------------------------|
| <i>Lymph node status</i>              | 0                                      | 1                      |                            | <b>0.000016</b>             |
|                                       | 1-3                                    | 1.63                   | 1.30-2.03                  |                             |
|                                       | >3                                     | 2.64                   | 1.70-4.11                  |                             |
| <i>MMP13 and ETV4 mRNA expression</i> | Low <i>MMP13</i> and high <i>ETV4</i>  | 1                      |                            | <b>0.00004</b>              |
|                                       | Low <i>ETV4</i>                        | 1.42                   | 1.20-1.67                  |                             |
|                                       | High <i>MMP13</i> and high <i>ETV4</i> | 2.01                   | 1.44-2.80                  |                             |
| <i>Macroscopic tumor size</i>         | ≤25mm                                  | 1                      |                            | <b>0.0028</b>               |
|                                       | >25mm                                  | 1.61                   | 1.18-2.21                  |                             |
| <i>SBR histological grade</i>         | I                                      | 1                      |                            | 0.11 (NS)                   |
|                                       | II                                     | 1.23                   | 0.96-1.57                  |                             |
|                                       | III                                    | 1.5                    | 0.92-2.46                  |                             |
| <i>PR status</i>                      | Positive                               | 1                      |                            | 0.17 (NS)                   |
|                                       | Negative                               | 1.25                   | 0.91-1.72                  |                             |

<sup>a</sup> Hazard ratio.

<sup>b</sup> 95% Confidential Interval.

<sup>c</sup> Multivariate COX analysis.
